# Supplementary material for: Expression of CK7, CK19 and p16 in HPV-mediated oropharyngeal squamous cell carcinoma
Source: PeerJ. 2024 Nov 28;12:e18286. doi: 10.7717/peerj.18286 (PMC11608561; doi:10.7717/peerj.18286)
Supplement: Supplemental Information 1 [file peerj-12-18286-s001.xlsx]

## Sheet: OPSCC
No	Sex	Age	Smoking index	T Stage	N Stage	Clinic Stage	Nationality	Primary Site	Pathologic diagnosis	Degree of differentiation	Morphology	CK7 positive intensity（in tumor cells）	CK7%（in cancerous nest）	CK7 H scores（in cancerous nest）	CK19 positive intensity（in tumor cells）	CK19%（in cancerous nest）	CK19 H scores（in cancerous nest）	p16 positive intensity（in tumor cells）	p16%（in cancerous nest）	CK7（in pericancerous surface normal epithelium）	CK19（in pericancerous surface normal epithelium）	p16（in pericancerous surface normal epithelium）	CK7（in pericancerous crypts normal epithelium）	CK19（in pericancerous crypts normal epithelium）	p16（in pericancerous crypts normal epithelium）
1	Male	48	30	T4	N1	Ⅳ	the Han nationality	Tonsil	Squamous cell carcinoma	Medium	keratinizing	0	0	0	3	0.1	30	0	0	—	＋	＋	＋	＋	＋
2	Male	53	0	T3	N0	Ⅲ	the Han nationality	Tonsil	Squamous cell carcinoma	Well	keratinizing	0	0	0	0	0	0	0	0	—	＋	＋	＋	＋	＋
3	Male	64	20	T4	N2	Ⅳ	the Han nationality	Tonsil	Squamous cell carcinoma	Well	keratinizing	0	0	0	0	0	0	0	0	—	－	－	—	－	－
4	Female	64	0	T3	N2	Ⅳ	the Han nationality	Tonsil	Squamous cell carcinoma	Low	non-keratinizing	0	0	0	2	0.6	120	0	0	—	＋	＋	—	＋	＋
5	Female	77	0	T1	N2	Ⅳ	the Han nationality	Tonsil	Squamous cell carcinoma	Well	keratinizing	0	0	0	3	0.65	195	0	0	—	—	—	—	—	—
6	Male	49	20	T2	N1	Ⅲ	the Han nationality	Tonsil	Squamous cell carcinoma	Well	non-keratinizing	0	0	0	1	0.1	10	0	0	—	＋	—	—	＋	＋
7	Female	48	0	T3	N0	Ⅱ	the Han nationality	Tonsil	Squamous cell carcinoma	Medium	non-keratinizing	1	0.7	70	3	0.9	270	2	70%+	—	—	—	—	—	—
8	Female	58	0	T3	pN1	Ⅱ	the Han nationality	Tonsil	Squamous cell carcinoma	Medium	keratinizing	3	0.6	180	3	0.75	225	3	70%+	＋	＋	＋	＋	＋	＋
9	Male	50	0	T3	N2	Ⅳ	the Han nationality	Tonsil	Squamous cell carcinoma	Well	non-keratinizing	1	0.3	30	3	0.85	255	0	0	＋	＋	＋	＋	＋	＋
10	Male	58	20	T2	N2	Ⅳ	the Han nationality	Tonsil	Squamous cell carcinoma	Well	keratinizing	1	0.05	5	3	0.8	240	2	0.05	＋	＋	＋	—	—	—
11	Male	40	0	T3	N2	Ⅳ	the Chuang nationality	Tonsil	Squamous cell carcinoma	Well	non-keratinizing	1	0.05	5	3	0.35	105	0	0	＋	＋	＋	＋	＋	＋
12	Male	67	40	T2	N3	Ⅳ	the Han nationality	Tonsil	Squamous cell carcinoma	Well	non-keratinizing	0	0	0	3	0.2	60	0	0	＋	＋	＋	＋	＋	＋
13	Male	67	0	T4	N2	Ⅳ	the Han nationality	Tonsil	Squamous cell carcinoma	Medium	non-keratinizing	1	0.05	5	3	0.4	120	0	0	—	—	—	—	—	—
14	Male	39	0	T2	N0	Ⅱ	the Chuang nationality	Tonsil	Squamous cell carcinoma	Low	non-keratinizing	0	0	0	3	0.8	240	3	70%+	—	—	—	—	—	—
15	Male	62	60	T2	N2	Ⅳ	the Chuang nationality	Tonsil	Squamous cell carcinoma	Well	non-keratinizing	1	0.75	75	3	0.1	30	0	0	＋	＋	—	—	—	—
16	Male	58	0	T2	N0	Ⅰ	the Han nationality	Tonsil	Squamous cell carcinoma	Medium	non-keratinizing	1	0.1	10	1	0.5	50	2	70%+	＋	＋	—	＋	＋	—
17	Female	45	0	T3	N0	Ⅱ	the Chuang nationality	Tonsil	Squamous cell carcinoma	Medium	non-keratinizing	3	0.8	240	2	0.8	160	2	70%+	＋	＋	＋	＋	＋	—
18	Male	59	0	T4	N2	Ⅳ	the Han nationality	Tonsil	Squamous cell carcinoma	Low	non-keratinizing	0	0	0	2	0.2	40	3	70%+	—	—	—	—	—	—
19	Male	48	0	T2	N0	Ⅰ	the Chuang nationality	Tonsil	Squamous cell carcinoma	Low	non-keratinizing	2	0.1	20	2	0.8	160	3	70%+	—	＋	—	＋	＋	＋
20	Male	65	0	T2	N1	Ⅱ	the Chuang nationality	Tonsil	Squamous cell carcinoma	Medium	non-keratinizing	1	0.2	20	2	0.8	160	3	70%+	—	—	—	＋	＋	—
21	Male	46	0	T4	N2	Ⅳ	the Jing nationality	Tonsil	Squamous cell carcinoma	Medium	non-keratinizing	3	0.5	150	2	0.5	100	3	70%+	—	—	—	—	—	—
22	Male	56	0	T3	N0	Ⅱ	the Han nationality	Tonsil	Squamous cell carcinoma	Medium	non-keratinizing	2	0.7	140	2	0.65	195	3	70%+	—	—	—	＋	＋	—
23	Male	49	0	T3	N1	Ⅱ	the Chuang nationality	Tonsil	Squamous cell carcinoma	Medium	non-keratinizing	0	0	0	2	0.75	150	3	70%+	＋	＋	—	＋	＋	—
24	Male	61	0	T1	N0	Ⅰ	the Chuang nationality	Tonsil	Squamous cell carcinoma	Well	keratinizing	0	0	0	0	0	0	0	0	－	－	－	－	－	－
25	Male	50	0	T4	N3	Ⅳ	the Han nationality	Tonsil	Squamous cell carcinoma	Well	keratinizing	0	0	0	0	0	0	0	0	－	－	－	－	－	－
26	Male	63	0	T1	N2	Ⅳ	the Chuang nationality	Tonsil	Squamous cell carcinoma	Medium	non-keratinizing	0	0	0	0	0	0	0	0	－	－	－	－	－	－
27	Male	54	0	T2	N2	Ⅳ	the Chuang nationality	Tonsil	Squamous cell carcinoma	Well	non-keratinizing	0	0	0	0	0	0	0	0	－	－	－	－	－	－
28	Female	52	0	T2	N2	Ⅳ	the Han nationality	Tonsil	Squamous cell carcinoma	Low	non-keratinizing	0	0	0	2	0.2	40	0	0	－	－	－	－	－	－
29	Male	56	30	T4	N1	Ⅳ	the Han nationality	Tonsil	Squamous cell carcinoma	Medium	non-keratinizing	0	0	0	0	0	0	0	0	－	－	－	－	－	－
30	Male	55	10	T3	N1	Ⅲ	the Han nationality	Tonsil	Squamous cell carcinoma	Low	non-keratinizing	0	0	0	0	0	0	0	0	－	＋	－	＋	＋	－
31	Male	49	20	T2	N2	Ⅳ	the Han nationality	Tonsil	Squamous cell carcinoma	Medium	non-keratinizing	0	0	0	0	0	0	0	0	－	－	－	－	－	－
32	Male	48	0	T2	N2	Ⅳ	the Han nationality	Tonsil	Squamous cell carcinoma	Medium	non-keratinizing	0	0	0	2	0.5	100	0	0	－	－	－	－	－	－
33	Male	74	20	T4	N0	ⅣA	the Chuang nationality	Base of tongue	Squamous cell carcinoma	Low	non-keratinizing	0	0	0	0	0	0	0	0	－	＋	＋	－	－	－
34	Male	43	0	T3	N3	ⅣB	the Chuang nationality	Base of tongue	Squamous cell carcinoma	Medium	non-keratinizing	0	0	0	0	0	0	0	0	－	＋	－	＋	＋	－
35	Male	46	0	T4	N2	ⅣA	the Chuang nationality	Base of tongue	Squamous cell carcinoma	Medium	non-keratinizing	0	0	0	3	0.3	90	0	0	－	＋	－	－	－	－
36	Male	54	0	T1	N0	Ⅰ	the Han nationality	Base of tongue	Squamous cell carcinoma	Well	keratinizing	0	0	0	0	0	0	0	0	－	＋	＋	－	－	－
37	Female	64	0	T1	pN1	Ⅰ	the Han nationality	Base of tongue	Squamous cell carcinoma	Well	keratinizing	1	0.9	90	2	0.95	190	2	70%+	－	＋	＋	—	—	—
38	Male	66	40	T4	N2	ⅣA	the Chuang nationality	Base of tongue	Squamous cell carcinoma	Well	keratinizing	2	0.7	140	1	0.2	20	0	－	－	＋	＋	－	－	－
39	Male	56	10	T3	N2	ⅣA	the Chuang nationality	Base of tongue	Squamous cell carcinoma	Well	non-keratinizing	0	0	0	3	0.2	60	0	－	－	＋	－	－	－	－
40	Male	62	20	T2	N0	Ⅰ	the Han nationality	Base of tongue	Squamous cell carcinoma	Well	keratinizing	1	0.3	30	2	0.3	60	1	0.2	－	＋	＋	－	＋	＋
41	Male	67	0	T1	N0	Ⅰ	the Han nationality	Base of tongue	Squamous cell carcinoma	Medium	keratinizing	2	0.6	120	2	0.6	180	0	－	－	＋	＋	－	－	－
42	Male	34	0	T1	N2	ⅣA	the Han nationality	Base of tongue	Squamous cell carcinoma	Well	keratinizing	0	0	0	0	0	0	0	－	－	＋	＋	－	－	－
43	Male	49	0	T2	N2	ⅣA	the Han nationality	Base of tongue	Squamous cell carcinoma	Well	keratinizing	0	0	0	0	0	0	0	－	－	－	－	－	－	－
44	Male	61	0	T1	N0	Ⅰ	the Han nationality	Base of tongue	Squamous cell carcinoma	Well	keratinizing	2	0.8	160	2	0.75	150	3	70%+	＋	＋	－	—	—	—
45	Male	21	0	T2	N0	Ⅰ	the Han nationality	Base of tongue	Squamous cell carcinoma	Well	keratinizing	0	0	0	0	0	0	2	70%+	＋	＋	－	＋	＋	－
46	Female	52	0	T2	N0	Ⅰ	the Han nationality	Base of tongue	Squamous cell carcinoma	Medium	non-keratinizing	3	0.6	120	3	0.5	150	2	70%+	—	—	—	—	—	—
47	Male	52	0	T2	N0	Ⅰ	the Han nationality	Base of tongue	Squamous cell carcinoma	Medium	non-keratinizing	3	0.5	150	3	0.4	120	0	－	＋	＋	＋	－	－	－
48	Male	53	0	T1	N0	Ⅰ	the Han nationality	Base of tongue	Squamous cell carcinoma	Well	keratinizing	0	0	0	3	0.1	30	2	0.3	＋	＋	－	－	＋	－
49	Male	43	20	T2	N0	Ⅰ	the Han nationality	Base of tongue	Squamous cell carcinoma	Well	keratinizing	1	0.8	80	1	0.7	70	1	0.1	＋	＋	＋	－	－	－
50	Male	54	0	T4	N2	ⅣA	the Han nationality	Base of tongue	Squamous cell carcinoma	Medium	non-keratinizing	0	0	0	2	0.25	50	0	－	＋	＋	－	＋	＋	－
51	Male	56	20	T3	N1	Ⅲ	the Han nationality	Base of tongue	Squamous cell carcinoma	Well	keratinizing	1	0.05	5	3	0.1	30	0	－	＋	－	－	＋	＋	－
52	Male	52	20	T2	N0	Ⅰ	the Chuang nationality	Base of tongue	Squamous cell carcinoma	Well	keratinizing	0	0	0	3	0.5	150	0	－	＋	＋	－	－	－	－
53	Male	58	20	T2	N1	Ⅲ	the Jing nationality	Base of tongue	Squamous cell carcinoma	Medium	non-keratinizing	0	0	0	2	0.9	180	0	－	－	－	－	－	－	－
54	Male	59	10	T2	N1	Ⅲ	Tujia ethnic group	Base of tongue	Squamous cell carcinoma	Medium	non-keratinizing	3	0.7	210	3	0.7	210	0	－	＋	＋	－	＋	＋	－
55	Female	32	0	T1	N0	Ⅰ	the Han nationality	Base of tongue	Squamous cell carcinoma	Well	non-keratinizing	0	0	0	0	0	0	0	－	＋	＋	－	－	－	－
56	Male	68	0	T2	N1	Ⅲ	the Chuang nationality	Base of tongue	Squamous cell carcinoma	Medium	non-keratinizing	2	0.35	70	3	0.55	165	0	－	－	－	－	＋	＋	－
57	Female	66	0	T3	N0	Ⅱ	the Han nationality	Soft palate	Squamous cell carcinoma	Medium	keratinizing	2	0.85	170	2	0.9	180	2	70+	－	－	－	\	\	\
58	Male	41	30	T4	NO	ⅣA	the Chuang nationality	Soft palate	Squamous cell carcinoma	Well	keratinizing	0	0	0	2	0.8	160	0	－	－	＋	－	\	\	\
59	Male	65	30	T2	N0	Ⅱ	the Chuang nationality	Soft palate	Squamous cell carcinoma	Medium	non-keratinizing	0	0	0	3	0.8	240	0	－	－	－	＋	\	\	\
60	Male	58	0	T2	N2	ⅣA	the Han nationality	Soft palate	Squamous cell carcinoma	Medium	non-keratinizing	0	0	0	3	0.55	165	0	－	－	－	＋	\	\	\
61	Male	49	20	T4	N0	ⅣA	the Han nationality	Soft palate	Squamous cell carcinoma	Well	keratinizing	0	0	0	2	0.6	120	0	－	－	－	－	\	\	\
62	Male	64	0	T3	N1	Ⅲ	the Chuang nationality	Soft palate	Squamous cell carcinoma	Medium	non-keratinizing	0	0	0	0	0	0	0	－	－	－	－	\	\	\
63	Male	57	20	T2	N1	Ⅲ	the Han nationality	Soft palate	Squamous cell carcinoma	Medium	non-keratinizing	1	0.15	15	3	0.95	285	0	－	－	＋	＋	\	\	\
64	Female	51	0	T1	N0	Ⅰ	the Chuang nationality	Soft palate	Squamous cell carcinoma	Low	non-keratinizing	1	0.8	80	2	0.8	160	2	70%+	－	＋	－	\	\	\
65	Male	82	0	T2	N2	ⅣA	the Han nationality	Soft palate	Squamous cell carcinoma	Low	non-keratinizing	1	0.85	85	2	0.9	180	0	－	－	－	－	\	\	\
66	Male	71	5	T4	N0	ⅣA	the Han nationality	Soft palate	Squamous cell carcinoma	Well	non-keratinizing	0	0	0	1	0.05	5	1	0.05	－	－	－	\	\	\
67	Male	53	0	T1	N0	Ⅰ	the Han nationality	Soft palate	Squamous cell carcinoma	Medium	non-keratinizing	2	0.35	70	3	0.8	240	2	70%+	＋	＋	＋	\	\	\
68	Female	50	0	T2	N0	Ⅱ	the Chuang nationality	Soft palate	Squamous cell carcinoma	Low	non-keratinizing	1	0.05	5	3	0.75	225	2	70%+	＋	＋	－	\	\	\
69	Female	34	0	T2	N0	Ⅱ	the Han nationality	Soft palate	Squamous cell carcinoma	Medium	keratinizing	0	0	0	1	0.4	40	0	－	－	－	－	\	\	\

## Sheet: OSCC
No	Primary Site	Pathologic diagnosis	CK7 positive intensity	CK7%	CK7 H scores	CK19 positive intensity	CK19%	CK19 H scores	p16 positive intensity	p16%	CK7	CK19	P16
1	Body of tongue	Squamous cell carcinoma	1	0.4	40	2	0.7	140	0	0	—	＋	＋
2	Body of tongue	Squamous cell carcinoma	0	0	0	0	0	0	1	0.1	—	＋	＋
3	Body of tongue	Squamous cell carcinoma	2	0.5	100	1	0.1	10	0	0	—	—	+
4	Body of tongue	Squamous cell carcinoma	0	0	0	0	0	0	0	0	＋	＋	—
5	Body of tongue	Squamous cell carcinoma	1	0.3	30	2	0.3	60	0	0	＋	＋	＋
6	Body of tongue	Squamous cell carcinoma	0	0	0	1	0.1	10	1	0.1	—	＋	-
7	Body of tongue	Squamous cell carcinoma	0	0	0	1	0.15	15	0	0	＋	＋	＋
8	Body of tongue	Squamous cell carcinoma	0	0	0	2	0.2	40	0	0	—	—	—
9	Body of tongue	Squamous cell carcinoma	0	0	0	0	0	0	0	0	＋	＋	＋
10	Body of tongue	Squamous cell carcinoma	0	0	0	0	0	0	0	0	—	＋	—
11	Body of tongue	Squamous cell carcinoma	1	0.05	5	1	0.1	10	1	0.1	＋	＋	＋
12	Body of tongue	Squamous cell carcinoma	0	0	0	0	0	0	0	0	—	＋	＋
13	Body of tongue	Squamous cell carcinoma	0	0	0	1	0.65	65	2	0.7	—	＋	＋
14	Body of tongue	Squamous cell carcinoma	0	0	0	0	0	0	0	0	＋	＋	—
15	Body of tongue	Squamous cell carcinoma	2	0.55	50	3	0.6	180	1	0.05	—	＋	＋
16	Body of tongue	Squamous cell carcinoma	0	0	0	0	0	0	0	0	—	—	＋
17	Body of tongue	Squamous cell carcinoma	1	0.3	30	2	0.75	150	0	0	—	—	—
18	Body of tongue	Squamous cell carcinoma	0	0	0	0	0	0	0	0	—	＋	—
19	Body of tongue	Squamous cell carcinoma	0	0	0	0	0	0	0	0	—	—	—
20	Buccal mucosa	Squamous cell carcinoma	0	0	0	3	0.75	225	0	0	—	＋	＋
21	Buccal mucosa	Squamous cell carcinoma	0	0	0	1	0.7	70	0	0	＋	＋	＋
22	Buccal mucosa	Squamous cell carcinoma	0	0	0	0	0	0	2	0.7	—	—	—
23	Buccal mucosa	Squamous cell carcinoma	1	0.1	10	2	0.3	60	0	0	—	—	—
24	Buccal mucosa	Squamous cell carcinoma	2	0.95	190	0	0	0	0	0	—	—	—
25	Buccal mucosa	Squamous cell carcinoma	0	0	0	1	0.15	15	0	0	＋	＋	—
26	Buccal mucosa	Squamous cell carcinoma	0	0	0	0	0	0	0	0	—	—	＋
27	Buccal mucosa	Squamous cell carcinoma	1	0.4	40	1	0.4	40	0	0	—	—	—
28	Buccal mucosa	Squamous cell carcinoma	1	0.05	5	0	0	0	0	0	—	—	—
29	Buccal mucosa	Squamous cell carcinoma	0	0	0	1	0.35	35	0	0	—	—	—
30	Gingival	Squamous cell carcinoma	0	0	0	0	0	0	0	0	—	—	＋
31	Gingival	Squamous cell carcinoma	2	0.55	110	3	0.8	240	0	0	—	—	＋
32	Gingival	Squamous cell carcinoma	0	0	0	0	0	0	0	0	—	—	—
33	Gingival	Squamous cell carcinoma	0	0	0	1	0.05	5	1	0.05	—	＋	—
34	Gingival	Squamous cell carcinoma	0	0	0	0	0	0	0	0	—	—	—
35	Gingival	Squamous cell carcinoma	0	0	0	0	0	0	3	0.7	—	—	—
36	Gingival	Squamous cell carcinoma	0	0	0	0	0	0	0	0	—	＋	—
37	Gingival	Squamous cell carcinoma	1	0.05	5	3	0.55	165	2	0.3	—	—	＋
38	Gingival	Squamous cell carcinoma	0	0	0	1	0.75	75	0	0	＋	＋	—
39	Gingival	Squamous cell carcinoma	0	0	0	0	0	0	0	0	—	—	—
40	Gingival	Squamous cell carcinoma	0	0	0	0	0	0	0	0	—	—	—
